# Supplementary material for: Explaining discrepancies in self-reported quality of life in frail older people: a mixed-methods study
Source: Springer Nature journal article supplement (doi:10.1186/s12877-017-0641-y), 2017-10-26
Supplement: MOESM1 [file 15167234]

## Overview quantitative and qualitative survey

**Table 1. Overview quantitative survey**

| Domains                           | Specific variables / measurement instrument                                              | Description                                                                                                      |
|-----------------------------------|------------------------------------------------------------------------------------------|------------------------------------------------------------------------------------------------------------------|
| Socio-demographic characteristics | Age<br>Gender<br>Nationality<br>Country of birth<br>Marital status<br>Living arrangement |                                                                                                                  |
| Cognition                         | Montreal Cognitive Assessment (MoCA) (Nasreddine et al., 2005)                           | Multiple cognitive domains, including, amongst others, short-term memory, executive functioning, and orientation |
| Frailty                           | Comprehensive Frailty Assessment Instrument (CFAI; De Witte et al., 2013)                | Environmental, physical, psychological, and social frailty                                                       |
| Quality of life                   |                                                                                          | 1-item, 10-point scale                                                                                           |
| Meaning in life                   |                                                                                          | 1-item, 10-point scale                                                                                           |
| Mastery                           |                                                                                          | 1-item, 10-point scale                                                                                           |

**Table 2. Overview semi-structured qualitative survey**

| Topics                           | Questions                                                                                                                                                                                                                                                                                                                                                                                                                                                                                                                         |
|----------------------------------|-----------------------------------------------------------------------------------------------------------------------------------------------------------------------------------------------------------------------------------------------------------------------------------------------------------------------------------------------------------------------------------------------------------------------------------------------------------------------------------------------------------------------------------|
| Frailty                          | <ul style="list-style-type: none"> <li>▪ It is often said that people become frail as they age. How do you experience this yourself?               <ul style="list-style-type: none"> <li>• What does frailty mean to you?</li> <li>• Do you feel more or less frail than other people your age? (<i>Do they feel frail?</i>)</li> </ul> </li> </ul>                                                                                                                                                                              |
| Quality of life, meaning in life | <ul style="list-style-type: none"> <li>▪ Do you believe that frailty affects the quality of life and meaning of life?               <ul style="list-style-type: none"> <li>• What is your view on that? Do you experience that yourself?</li> <li>• What are things that contribute to your quality of life, despite being frail?</li> <li>• What makes your life meaningful (worthwhile, purposeful)?</li> <li>• As a frail older person, what do you need to be able to lead a quality, meaningful life?</li> </ul> </li> </ul> |
| Mastery                          | <ul style="list-style-type: none"> <li>▪ Do you feel like you have control over the things that happen in your life?</li> </ul>                                                                                                                                                                                                                                                                                                                                                                                                   |

- To what extent do you feel able to make your own decisions regarding what happens in your life?
  - How can you keep control of your own life? What does that require?
- Dealing with problems
- What should an older person do to maintain his/her quality of life / mastery / meaning in life when becoming frail?
    - What is your own experience in that respect? How do you see that, in your own case?
    - What factors influence this, do you think? (*Individual aspects, what part do (in)formal caregivers, the environment/neighborhood, ... play?*)
- Life-events
- Looking back on the last year, have there been any significant changes in your life?
    - Can you describe important positive and negative changes that have happened in the past year?
    - What was your most positive experience of the last year?
    - In contrast to the high, did you perhaps also experience a low point during the last year?
- Future perspective
- Do you expect your life to have changed in a year's time?
  - Do you have any specific expectations for the future?
    - What dreams do you have? Are there dreams you want to accomplish?
    - What obstacles do you expect?  
*(Do they think that they will have a quality life? That they will become frail?)*
-
